# Supplementary material for: Hominoid-Specific De Novo Protein-Coding Genes Originating from Long Non-Coding RNAs
Source: PLOS journal article supplement (doi:10.1371/journal.pgen.1002942), 2012-09-13

Figure S4

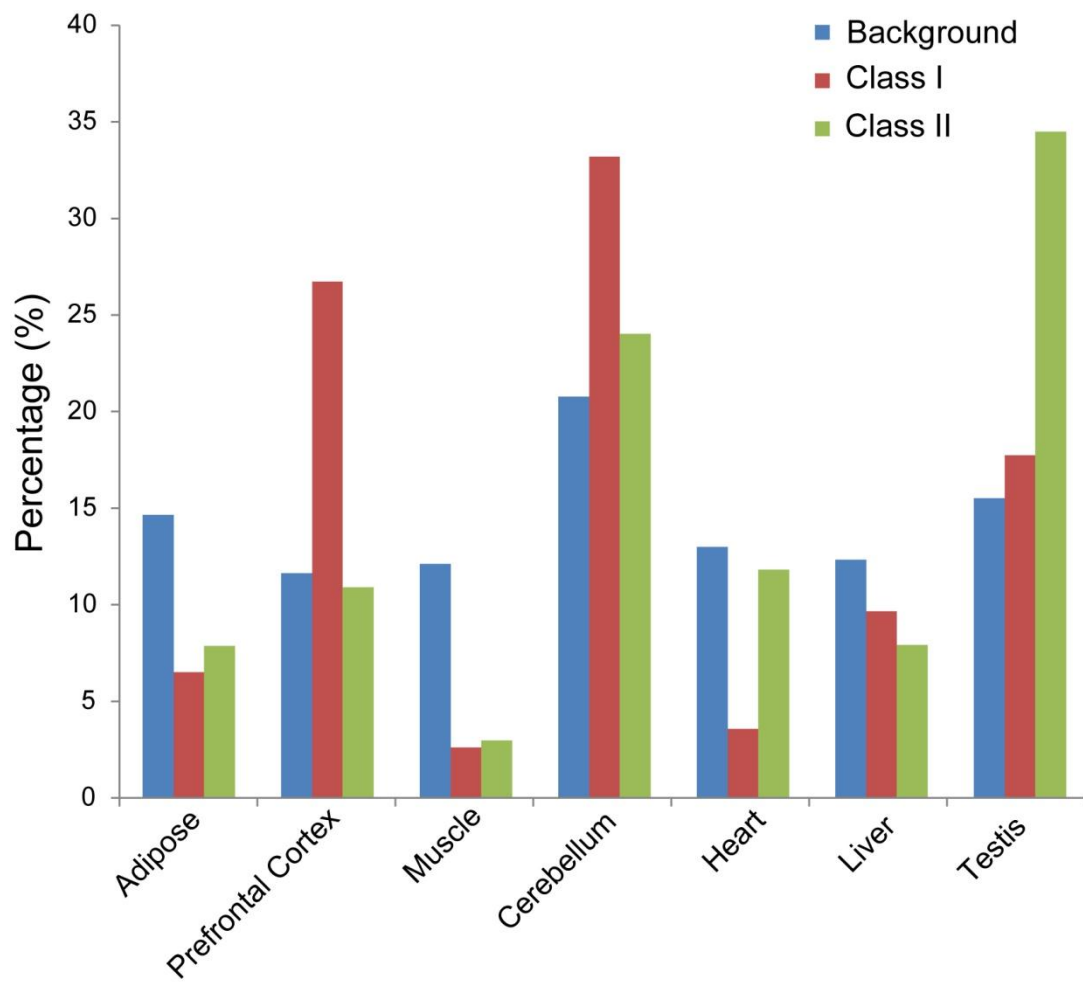

Supplement: S5 (10.1371/journal.pgen.1002942.s005) [file journal.pgen.1002942.s005]
